# Supplementary material for: The remarkably improved hydrogen storage performance of MgH2by the synergetic effect of an FeNi/rGO nanocomposite
Source: Royal Society of Chemistry journal article supplement (doi:10.1039/d0dt00230e), 2020-01-01
Supplement: d0dt00230e1.pdf [file d0dt00230e1.pdf]

## Electronic Supplementary Material

### Remarkably improved hydrogen storage performance of $\text{MgH}_2$ by the synergetic effect of FeNi/rGO nanocomposite

Liang Ji<sup>a</sup>, Liuting Zhang<sup>a,\*</sup>, Xinglin Yang<sup>a</sup>, Xinqiao Zhu<sup>b</sup>, Lixin Chen<sup>c</sup>,

<sup>a</sup> *School of Energy and Power, Jiangsu University of Science and Technology, Zhenjiang 212003, China*

<sup>b</sup> *Institute of Nuclear Physics and Chemistry, China Academy of Engineering Physics, Mianyang, 621999, China*

<sup>c</sup> *State Key Laboratory of Silicon Materials, Department of Materials Science and Engineering, Zhejiang University, Hangzhou 310027, China*

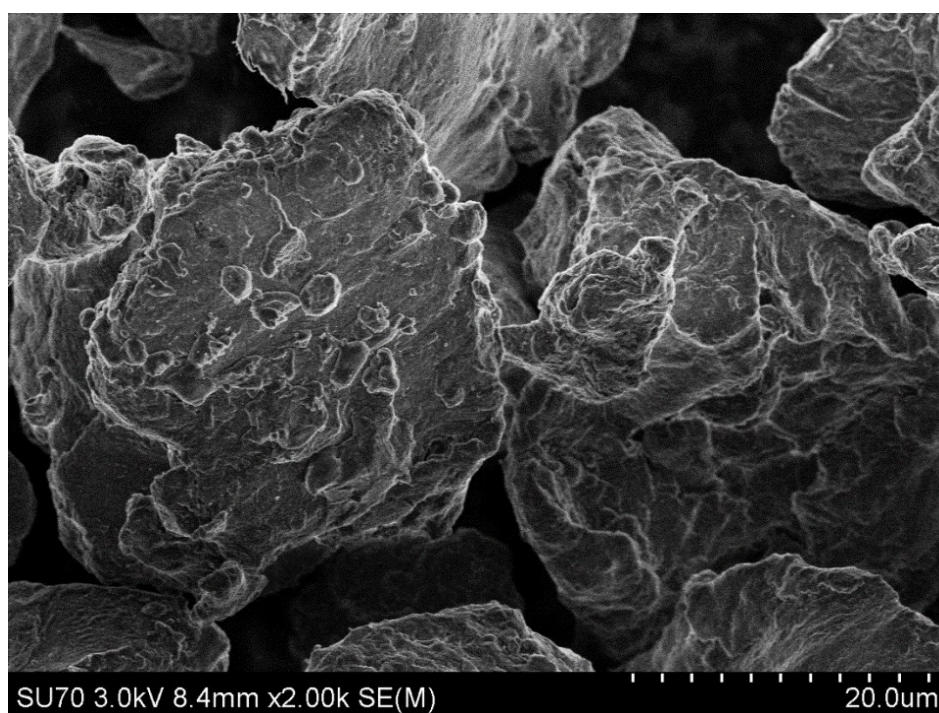

Fig. S1 SEM photograph of commercial  $\text{MgH}_2$ .<sup>[1]</sup>

---

\* To whom correspondence should be addressed. E-mail: zhanglt89@126.com

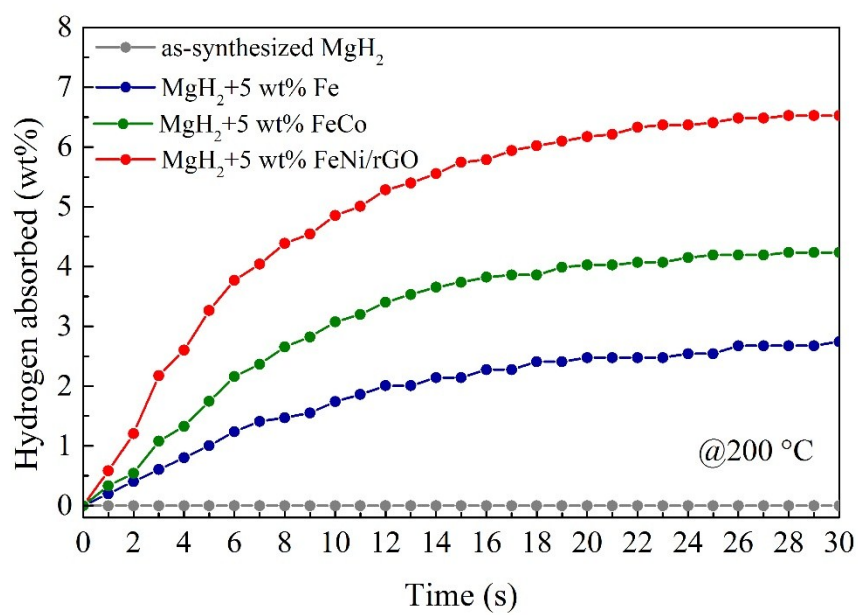

Fig. S2 Isothermal hydrogen absorption curves at 200 °C of as-synthesized MgH<sub>2</sub>, MgH<sub>2</sub>+5 wt% Fe, MgH<sub>2</sub>+5 wt% FeCo, MgH<sub>2</sub>+5 wt% FeNi/rGO samples.

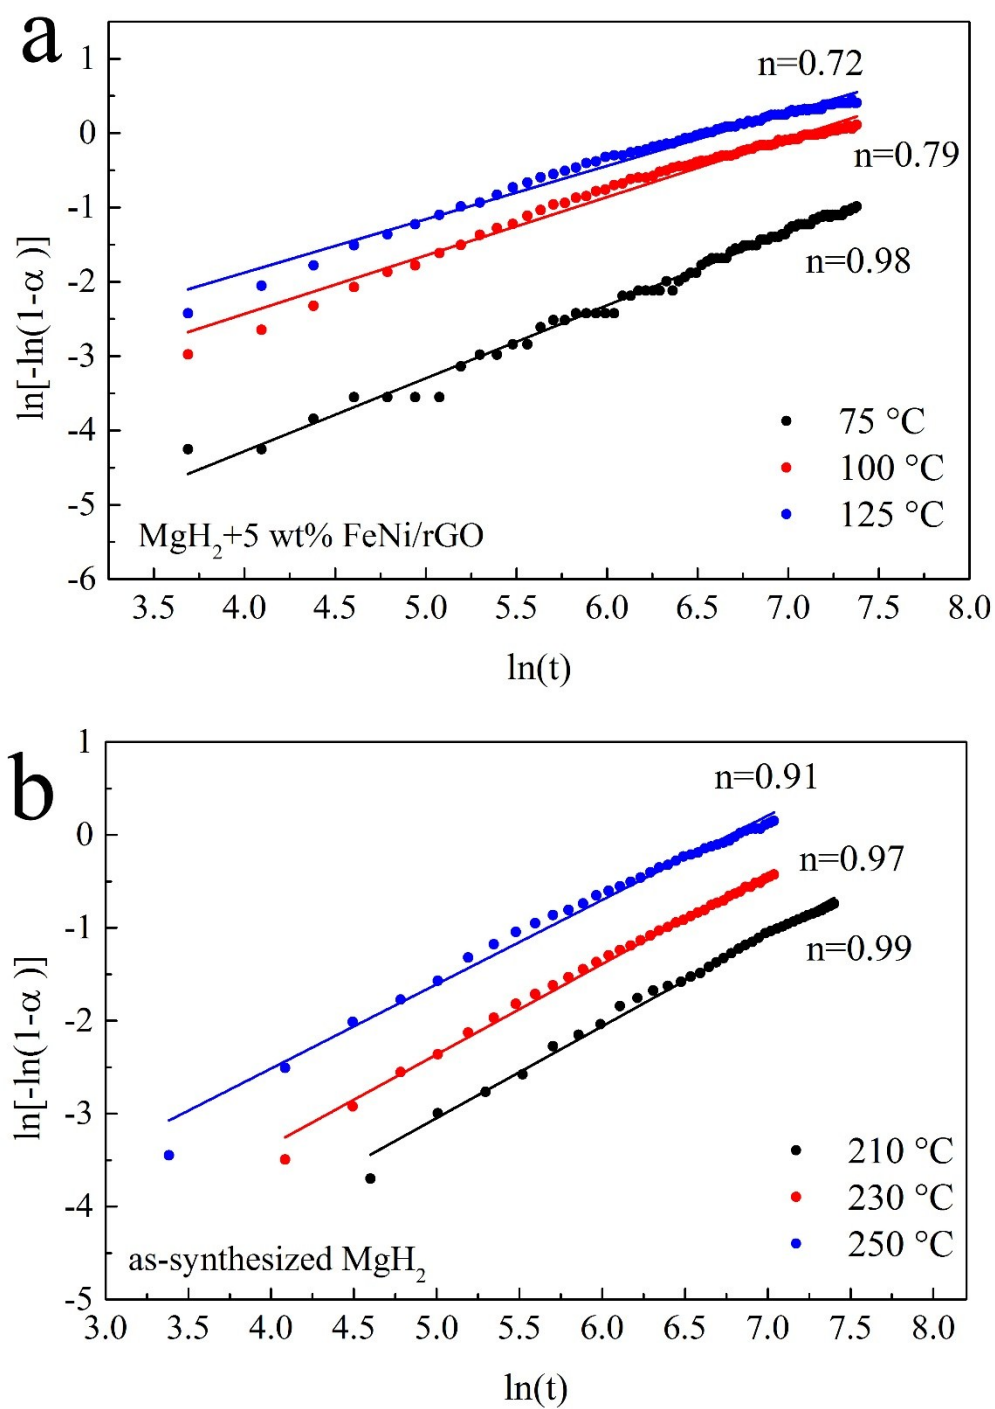

Fig. S3 JMAK plots of as-synthesized  $\text{MgH}_2$  with (a) and without (b) 5 wt% FeNi/rGO.

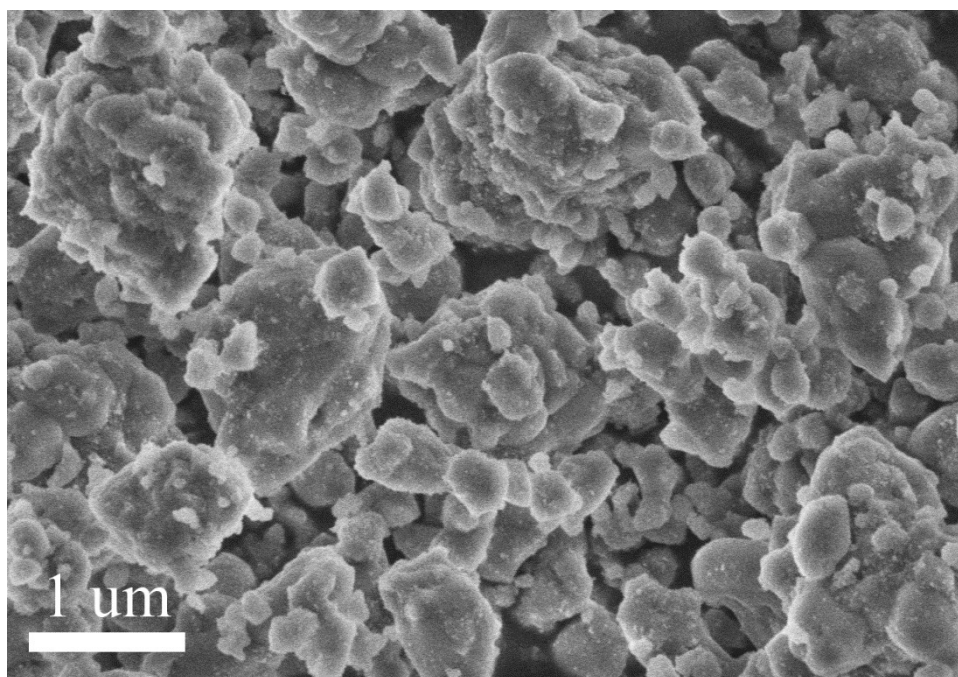

Fig. S4 SEM photograph of as-synthesized  $\text{MgH}_2$ .

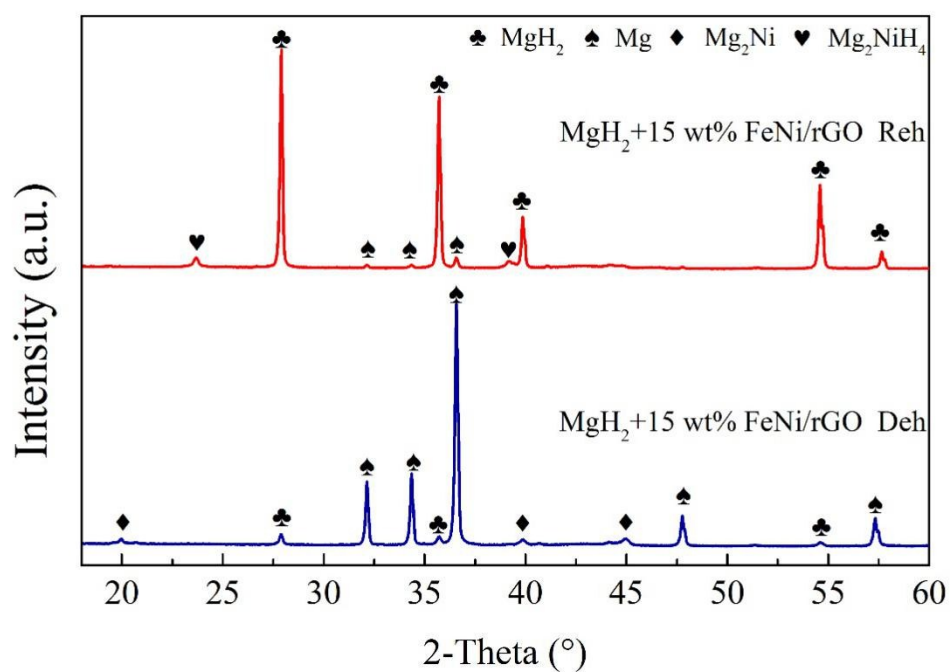

Fig. S5 XRD patterns of dehydrogenated and rehydrogenated  $\text{MgH}_2 + 15 \text{ wt\% FeNi/rGO}$ .

## References

- [1] L.T. Zhang, L.X. Chen, X.L. Fan, X.Z. Xiao, J.G. Zheng and X. Huang, *J. Mater. Chem. A*, 2017, **5**, 6178–6185.
